# Supplementary material for: Aspect ratio control of TaS2nanosheets: a methodology for room temperature formaldehyde gas sensing performance optimization
Source: Royal Society of Chemistry journal article supplement (doi:10.1039/d3tc00814b), 2023-01-01
Supplement: d3tc00814b1.pdf [file d3tc00814b1.pdf]

## Supporting Information

### Aspect Ratio Control of TaS<sub>2</sub> Nanosheets: A Methodology for Room Temperature Formaldehyde Gas Sensing Performance Optimization

Ying Wang,<sup>a</sup> Min Du,<sup>a</sup> Jiangang Xu,<sup>b</sup> Zhiyuan Zeng<sup>\*a</sup> and Derek Ho<sup>\*a,b</sup>

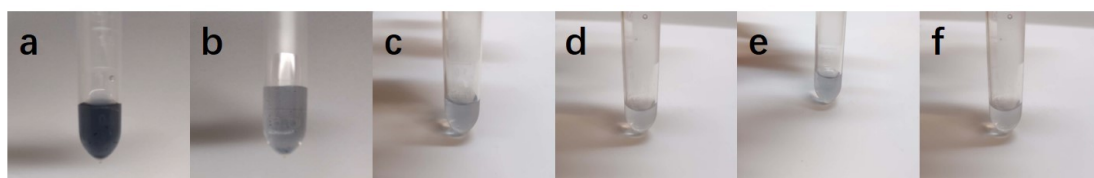

Figure S1. TaS<sub>2</sub> nanosheet dispersions synthesized using different centrifugation rates: (a) 2 krpm, (b) 4 krpm, (c) 6 krpm, (d) 8 krpm, (e) 10 krpm and (f) 12 krpm.

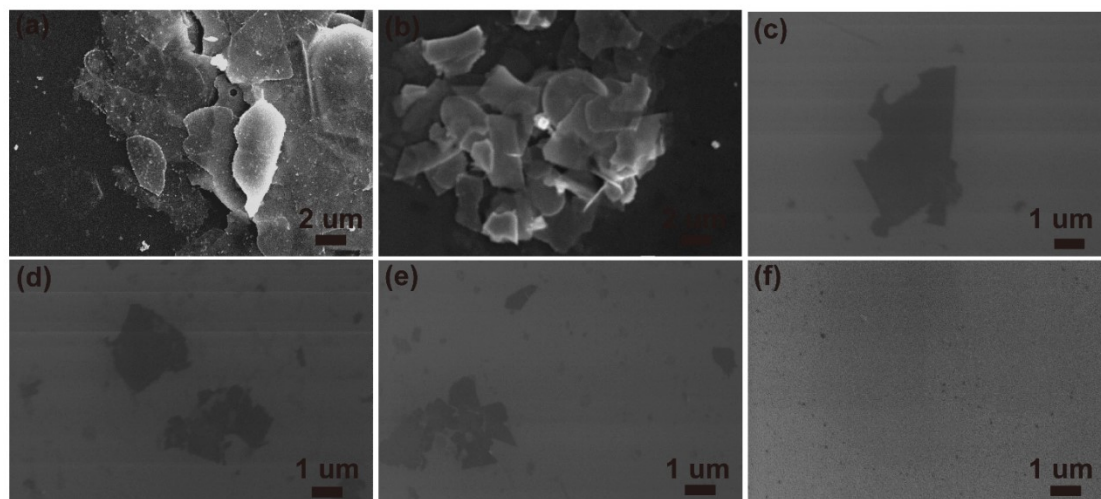

Figure S2. SEM images of TaS<sub>2</sub> nanosheet dispersions synthesized under different centrifugation rates: (a) 2 krpm, (b) 4 krpm, (c) 6 krpm, (d) 8 krpm, (e) 10 krpm and (f) 12 krpm.

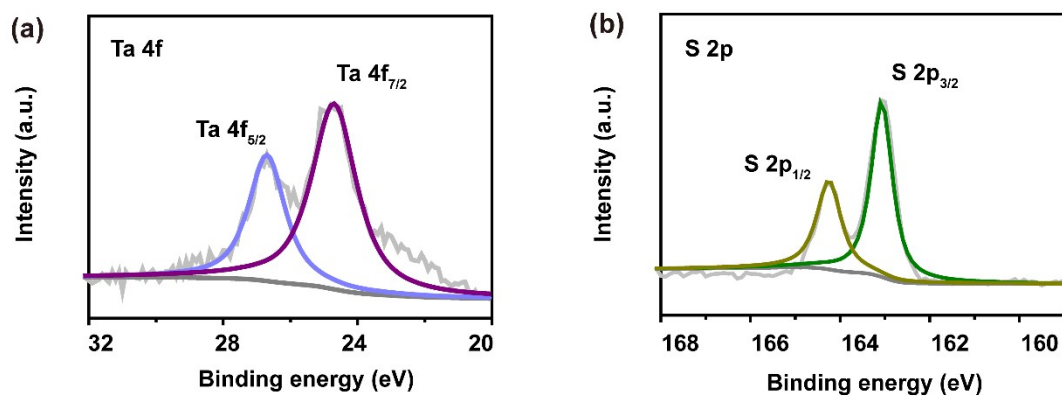

Figure S3. XPS spectra of TaS<sub>2</sub> nanosheet under 6 krpm: (a) Ta 4f and (b) S 2p.

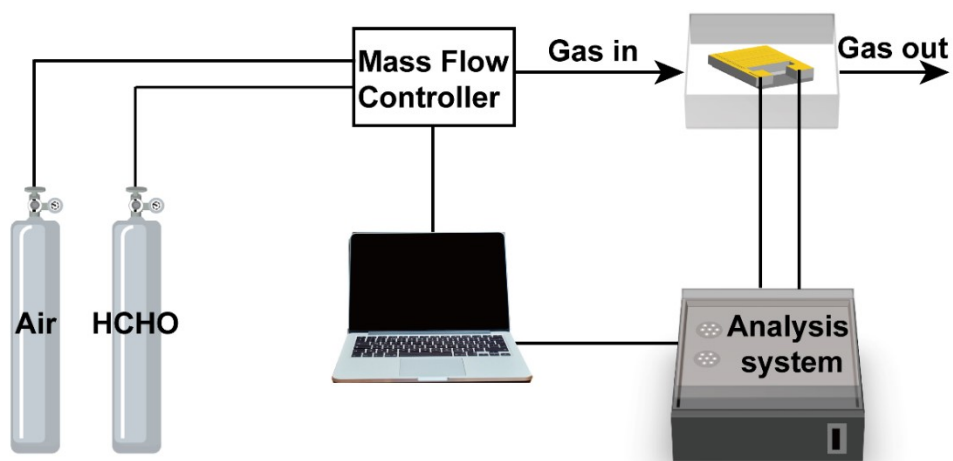

Figure S4. Schematic of custom gas testing system.

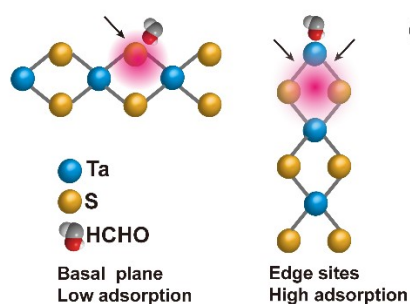

Figure S5. Schematic illustration of gas adsorption mechanism on edge sites and the basal plane of TaS<sub>2</sub>.

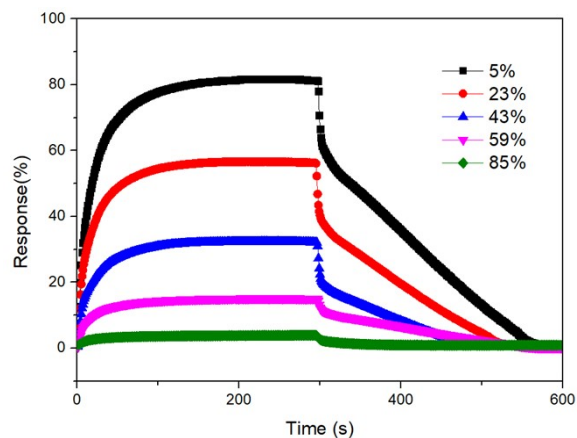

Figure S6. Dynamic responses for the 6k sensor towards 10 ppm formaldehyde under different relative humidities.

| Samples           | 2k  | 4k  | 6k  | 8k  | 10k | 12k |
|-------------------|-----|-----|-----|-----|-----|-----|
| Response time (s) | 49  | 57  | 68  | 72  | 81  | 92  |
| Recovery time (s) | 207 | 216 | 222 | 235 | 256 | 268 |

Table S1. Comparison table of response and recovery times.
